# Supplementary material for: Redox cationic frontal polymerization: a new strategy towards fast and efficient curing of defect-free fiber reinforced polymer composites
Source: Royal Society of Chemistry journal article supplement (doi:10.1039/d3ra05976f), 2023-01-01
Supplement: d3ra05976f2.pdf [file d3ra05976f2.pdf]

## Supporting Information

### Redox Cationic Frontal Polymerization: A new strategy towards fast and efficient curing of defect-free fiber reinforced polymer composites

Muhammad Salman Malik, Markus Wolfahrt and Sandra Schlögl

Polymer Competence Center Leoben, Rossegerstraße 12, 8700 Leoben, Austria

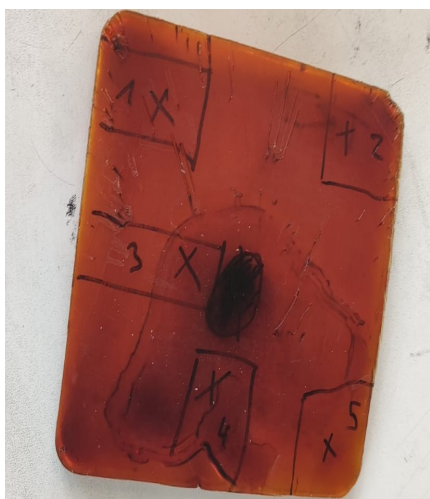

**S1** Image of a Limestone-RCFP resin cured in a Teflon mold. The portions on the cured plate from where samples were taken for DSC and FT-IR ATR measurements are labelled.

**Table S1** DSC and FT-IR ATR results for samples taken from Limestone-RCFP cured in a Teflon plate. The DSC and FT-IR ATR measurements were done according to the methods given in the manuscript.

| Portion number | Tg1<br>(°C) | ATR conversion (%) |
|----------------|-------------|--------------------|
| 1              | 86          | 97                 |
| 2              | 88          | 97                 |
| 3              | 95          | 98                 |
| 4              | 88          | 95                 |
| 5              | 94          | 98                 |

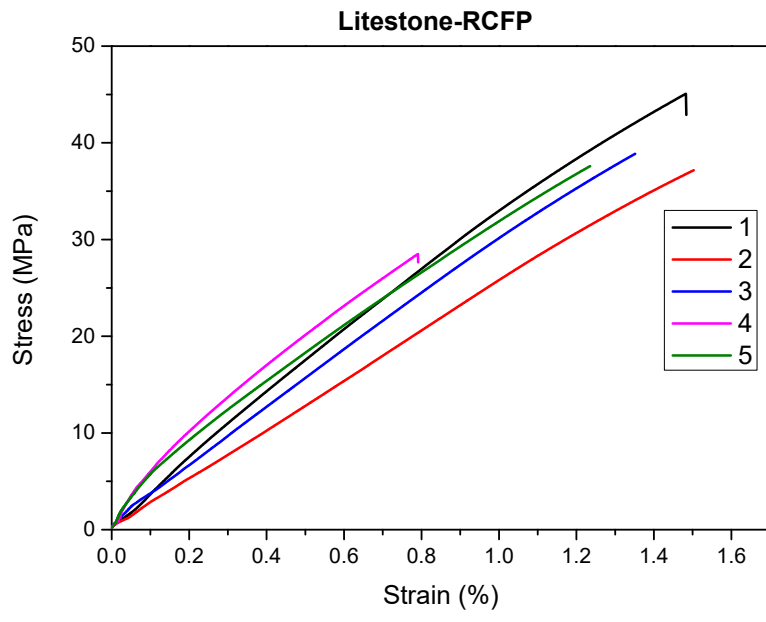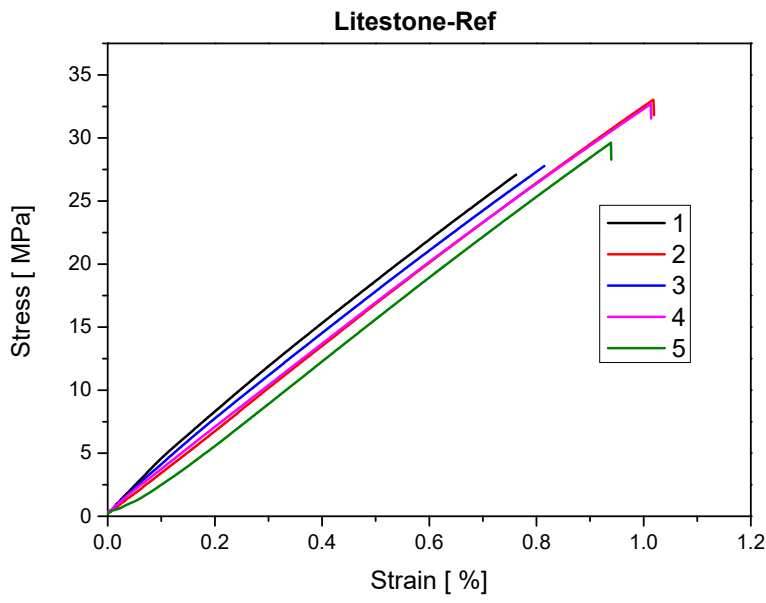

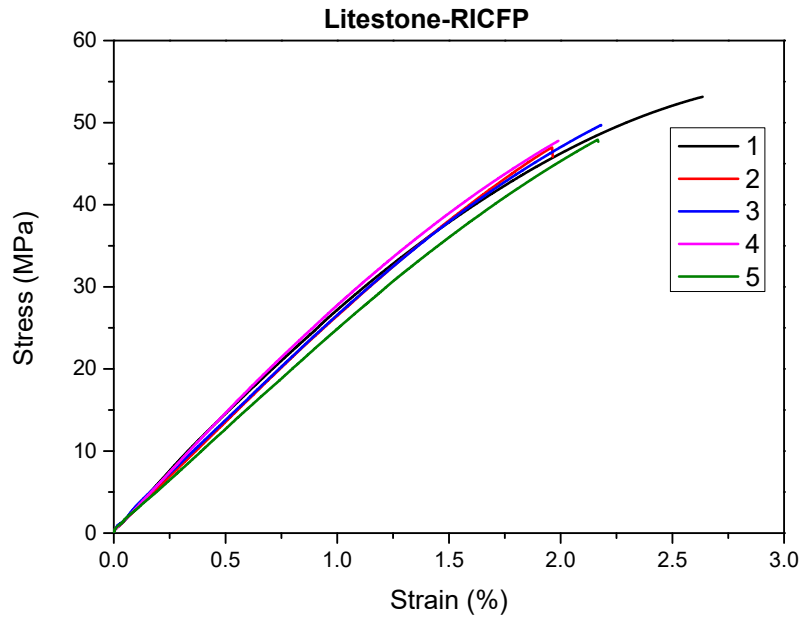

S2 Tensile stress-strain curves for RCFP, Ref and RICFP Litestone resins with at least 5 test specimens.

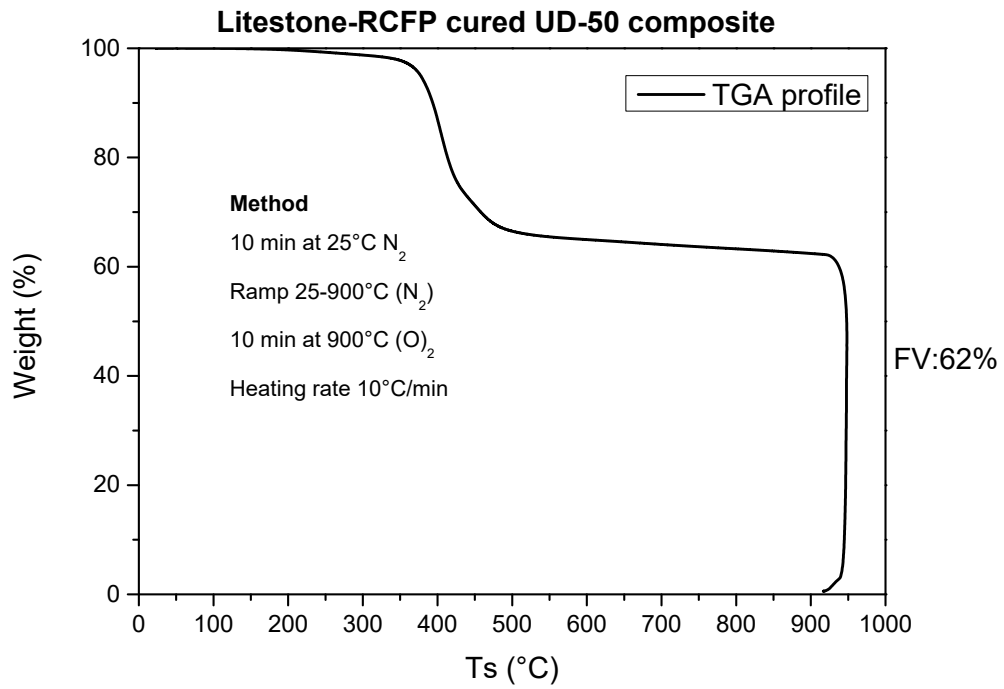

S3 Thermogravimetric profile of a UD-50 composite plate impregnated with Litestone resins cured via RCFP route. The fiber volume content calculated is equal to 62%.

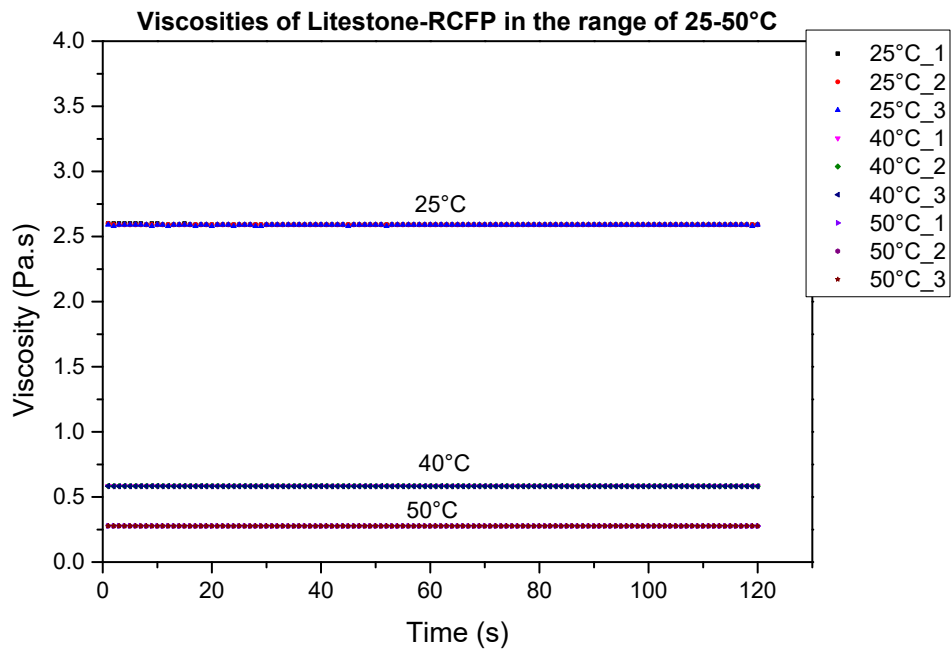

**S4** Results for rheology measurements in frequency-time sweep mode for Limestone-RCFP resins within temperature ranges between 25-50°C.

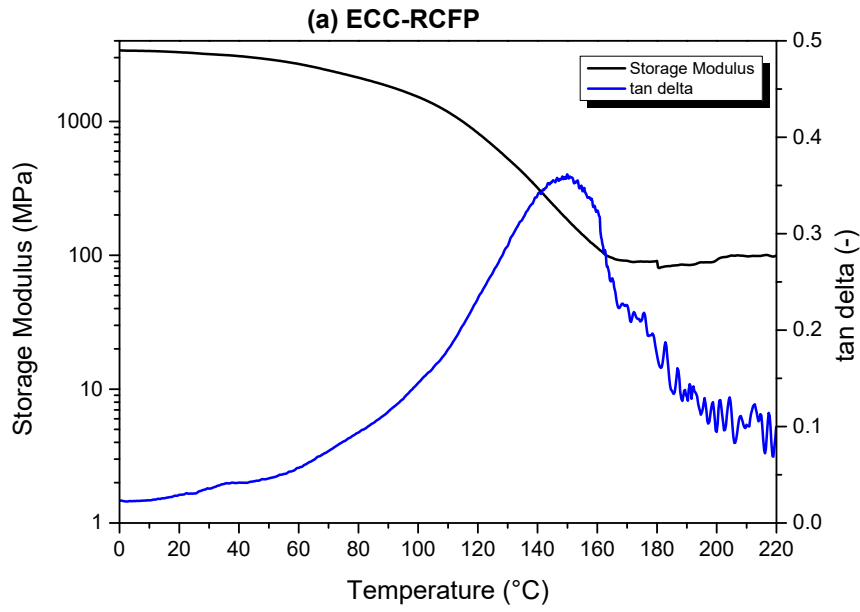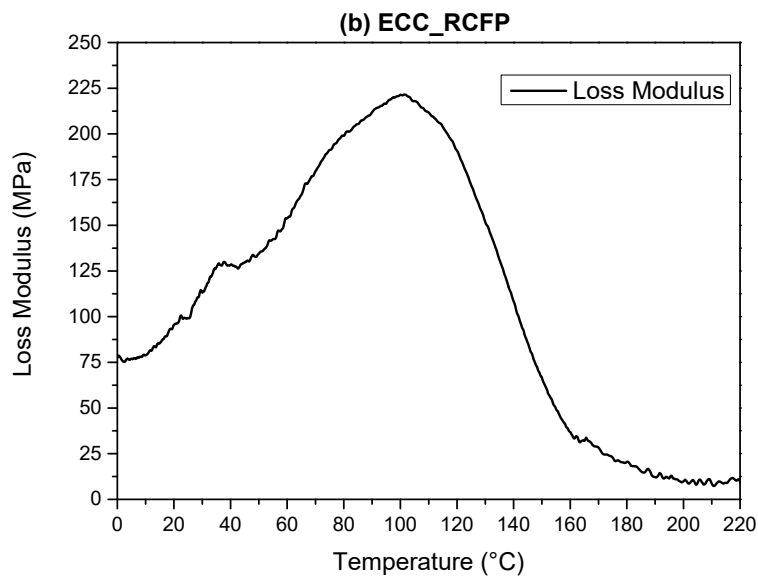

**S5** Logarithmic storage modulus and tan delta curve for cycloaliphatic epoxy cured via RCFP route along with corresponding (b) loss modulus curve.
